# Supplementary material for: Sodium Nitrite Attenuates Reduced Activity of Vascular Matrix Metalloproteinase-2 and Vascular Hyper-Reactivity and Increased Systolic Blood Pressure Induced by the Placental Ischemia Model of Preeclampsia in Anesthetized Rats
Source: MDPI journal article supplement (doi:10.3390/ijms241612818), 2023-08-15
Supplement: s1 [file s1]

**Table S1.** Average of maternal, fetal, placental, vascular function and biochemical parameters.

| Parameters                                                 | Group        |              |                                 |                                             |
|------------------------------------------------------------|--------------|--------------|---------------------------------|---------------------------------------------|
|                                                            | Norm-Preg    | Preg+Nitrite | RUPP                            | RUPP+Nitrite                                |
| Systolic blood pressure pregnancy day 21 (mmHg)            | 94 ± 2.4     | 78 ± 3.1 *   | 129 ± 6.9 * <sup>&amp;</sup>    | 107 ± 5.4 <sup>#</sup> <sup>&amp;</sup>     |
| Fetal weight (g)                                           | 4.5 ± 0.1    | 3.6 ± 0.1 *  | 3.3 ± 0.1 * <sup>&amp;</sup>    | 4.2 ± 0.1 <sup>#</sup> <sup>&amp;</sup>     |
| Placental weight (g)                                       | 0.33 ± 0.007 | 0.32 ± 0.007 | 0.28 ± 0.006 * <sup>&amp;</sup> | 0.32 ± 0.011 <sup>#</sup>                   |
| Litter size (number of pups)                               | 12.0 ± 0.8   | 7.0 ± 2.0 *  | 7.0 ± 0.5 *                     | 10.5 ± 1.0 <sup>#</sup>                     |
| Plasma levels of NO metabolites (mmol/L)                   | 23 ± 2.8     | 37 ± 3.3 *   | 13 ± 0.3 *                      | 15 ± 1.5 <sup>&amp;</sup>                   |
| Placental levels of NO metabolites (μmol/100 mg of tissue) | 158 ± 4.3    | 181 ± 8.5    | 218 ± 8.7 * <sup>&amp;</sup>    | 229 ± 12.2 * <sup>&amp;</sup>               |
| Phe Emax (%) e+                                            | 1.6 ± 0.1    | 1.6 ± 0.1    | 2.9 ± 0.2 * <sup>&amp;</sup>    | 2.2 ± 0.2 * <sup>#</sup> <sup>&amp;</sup>   |
| Phe Emax (%) e-                                            | 2.3 ± 0.3    | 2.4 ± 0.1    | 3.9 ± 0.3 * <sup>&amp;</sup>    | 2.8 ± 0.2 <sup>#</sup>                      |
| Phe pEC <sub>50</sub> (-log M) e+                          | 6.5 ± 0.1    | 6.2 ± 0.1    | 7.1 ± 0.3                       | 6.3 ± 0.3                                   |
| Phe pEC <sub>50</sub> (-log M) e-                          | 7.0 ± 0.2    | 6.2 ± 0.1    | 8.3 ± 0.2                       | 5.7 ± 1.1 <sup>#</sup>                      |
| ACh Emax (%) e+                                            | 87 ± 2.4     | 81 ± 3.7     | 52 ± 3.6 * <sup>&amp;</sup>     | 56 ± 1.1 * <sup>&amp;</sup>                 |
| ACh pEC <sub>50</sub> (-log M) e+                          | 6.0 ± 0.2    | 6.3 ± 0.4    | 4.2 ± 0.8                       | 7.0 ± 1.3                                   |
| 72kDa MMP-2 (Arbitrary units)                              | 0.32 ± 0.02  | 0.29 ± 0.03  | 0.09 ± 0.02 * <sup>&amp;</sup>  | 0.20 ± 0.02 * <sup>#</sup> <sup>&amp;</sup> |
| 64kDa MMP-2 (Arbitrary units)                              | 0.48 ± 0.04  | 0.44 ± 0.02  | 0.14 ± 0.01 * <sup>&amp;</sup>  | 0.30 ± 0.03 * <sup>#</sup> <sup>&amp;</sup> |

Data are expressed as means ± SEM in Norm-Preg (n = 10), Preg+Nitrite (n = 10), RUPP (n = 10) and RUPP+Nitrite (n = 10) groups. \*P < 0.05 vs Norm-Preg group; <sup>#</sup>P < 0.05 vs RUPP group and <sup>&</sup>P < 0.05 vs Preg+Nitrite group.

### Zymography gel 1 of abdominal aorta

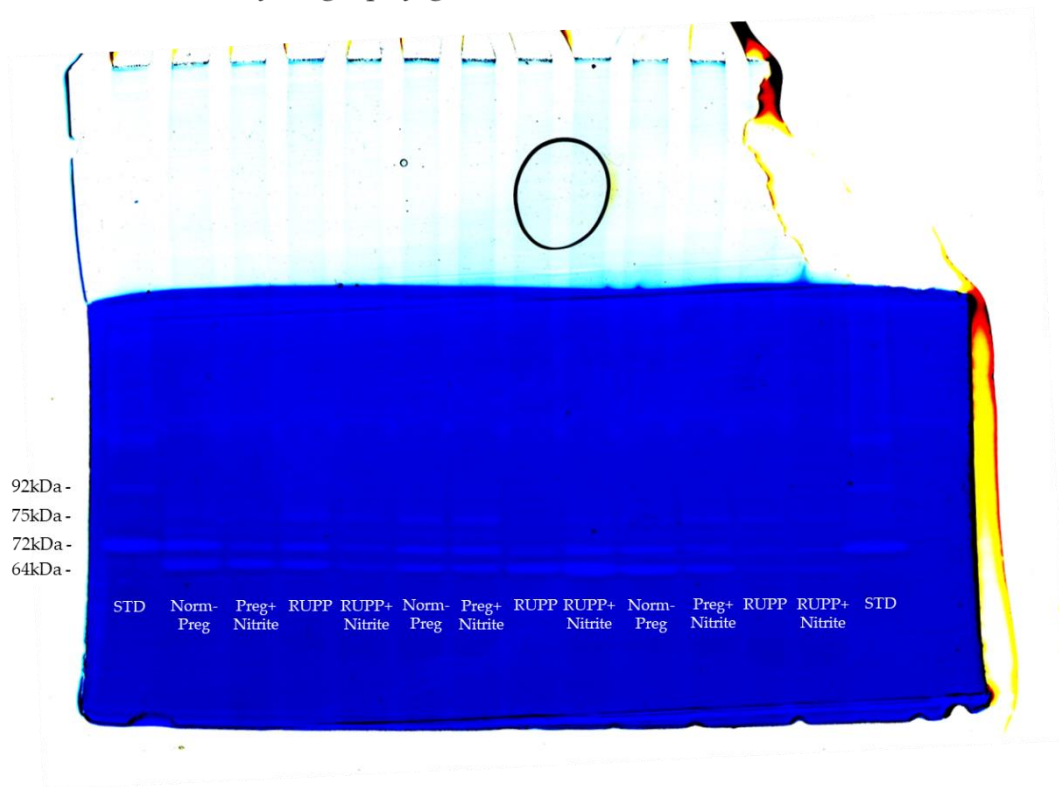

**Supplementary Figure S1.** Acrylamide gel stained with Coomassie Brilliant Blue to quantify the gelatinolytic activities of 92kDa MMP-9, 75kDa MMP-2, 72kDa MMP-2 and 64kDa MMP-2 in abdominal aorta samples of Norm-Preg, Preg+Nitrite, RUPP, and RUPP+Nitrite groups. STD: internal standard.

## Zymography gel 2 of abdominal aorta

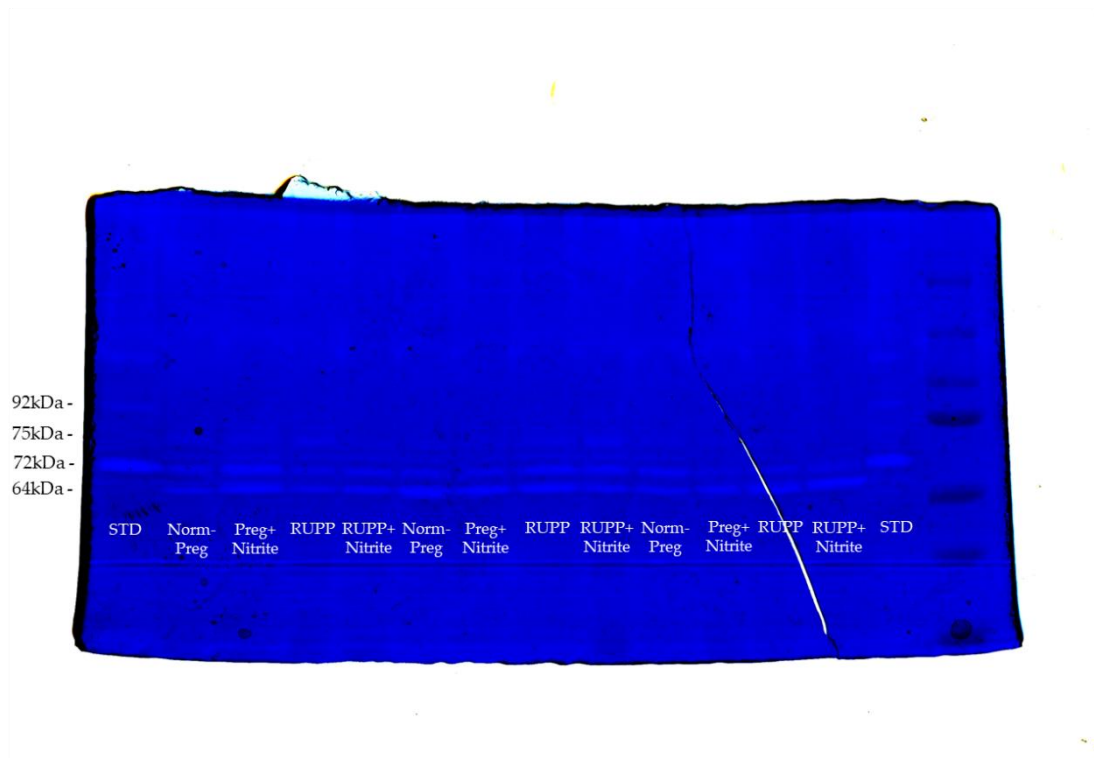

**Supplementary Figure S2.** Acrylamide gel stained with Coomassie Brilliant Blue to quantify the gelatinolytic activities of 92kDa MMP-9, 75kDa MMP-2, 72kDa MMP-2 and 64kDa MMP-2 in abdominal aorta samples of Norm-Preg, Preg+Nitrite, RUPP, and RUPP+Nitrite groups. STD: internal standard.

### Zymography gel 3 of abdominal aorta

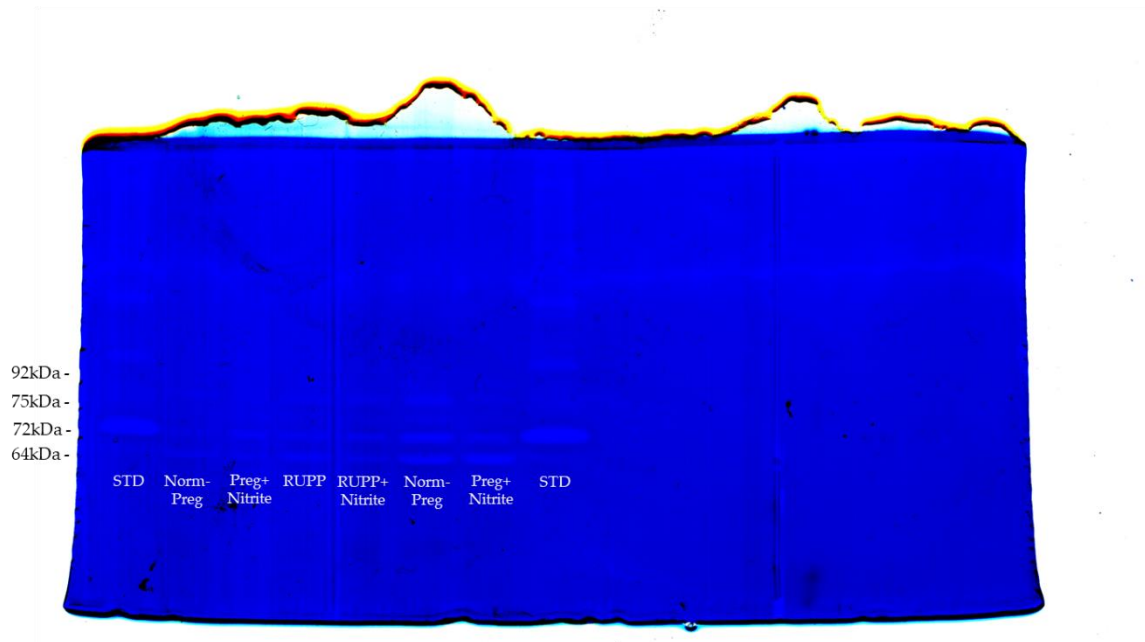

**Supplementary Figure S3.** Acrylamide gel stained with Coomassie Brilliant Blue to quantify the gelatinolytic activities of 92kDa MMP-9, 75kDa MMP-2, 72kDa MMP-2 and 64kDa MMP-2 in abdominal aorta samples of Norm-Preg, Preg+Nitrite, RUPP, and RUPP+Nitrite groups. STD: internal standard.
